# Supplementary material for: Late Pleistocene to Holocene event stratigraphy of Lake Hallstatt (Salzkammergut, Austria): revealed by the Hipercorig drilling system and borehole logging
Source: Copernicus journal article supplement (doi:10.5194/sd-33-1-2024), 2024-04-02
Supplement: Supplementary file 2 [file sd-33-1-2024-supplement.zip]

Archive with 5 entries (5 files):
- Supplement_Table_S2.xlsx
- ORTLER-Hallstatt_supplement.pdf
- Supplement_Table_S1.xlsx
- sd-33-1-2024-supplement-title-page.pdf
- Supplement_Table_S3.xlsx
