# Supplementary material for: Late Pleistocene to Holocene event stratigraphy of Lake Hallstatt (Salzkammergut, Austria): revealed by the Hipercorig drilling system and borehole logging
Source: Copernicus journal article supplement (doi:10.5194/sd-33-1-2024), 2024-04-02
Supplement: Supplementary file 2 [file sd-33-1-2024-supplement.zip › sd-33-1-2024-supplement-title-page.pdf]

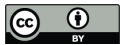

*Supplement of*

**Late Pleistocene to Holocene event stratigraphy of Lake Hallstatt (Salzkammergut, Austria): revealed by the Hiperorig drilling system and borehole logging**

**Marcel Ortler et al.**

*Correspondence to:* Marcel Ortler ([marcel-luciano.ortler@uibk.ac.at](mailto:marcel-luciano.ortler@uibk.ac.at))

- [sd-33-1-2024-supplement-title-page.pdf](#)
- [ORTLER-Hallstatt\\_supplement.pdf](#)
- [Supplement\\_Table\\_S1.xlsx](#)
- [Supplement\\_Table\\_S2.xlsx](#)
- [Supplement\\_Table\\_S3.xlsx](#)

The copyright of individual parts of the supplement might differ from the article licence.
