# Supplementary material for: Late Pleistocene to Holocene event stratigraphy of Lake Hallstatt (Salzkammergut, Austria): revealed by the Hipercorig drilling system and borehole logging
Source: Copernicus journal article supplement (doi:10.5194/sd-33-1-2024), 2024-04-02
Supplement: Supplementary file 2 [file sd-33-1-2024-supplement.zip › Supplement_Table_S1.xlsx]

## Sheet: Table_S1_splice
Name	Hole	Depth in section (mm)	Depth CLF-A (m)	Foam/Cap	Vertical offset	Depth CCLF-A (m)	Top depth mcd-splice	Name	Hole	Depth in section (mm)	Depth CLF-A (m)	Depth CCLF-A (m)	Bottom depth mcd-splice	comments
		Top interval (mm)	Top depth mblf			Top depth mcd				Bottom interval (mm)	Bottom mblf	Bottom depth mcd
1001_1_A_1_1	A	40	0.04	-0.04	0.095	0	0.135	1001_1_A_1_1	A	1000	1	0.96	1.095	tied to 2016 core (which represents mudline, as we missed it)
1001_1_A_1_2	A	5	1.005	-0.045	0.09	0.96	1.095	1001_1_A_1_2	A	300	1.3	1.255	1.39
1001_1_B_1_1	B	385	1.385	-0.04	0.005	1.345	1.39	1001_1_B_1_1	B	1000	2	1.96	2.005
1001_1_B_1_2	B	5	2.005	-0.045	0	1.96	2.005	1001_1_B_1_2	B	925	2.925	2.88	2.925
1001_1_A_2_1	A	400	2.4	-0.095	0.525	2.305	2.925	1001_1_A_2_1	A	1000	3	2.905	3.525	2016 splice better, as no proper correlation to Hole A
1001_1_A_2_2	A	5	3.005	-0.1	0.52	2.905	3.525	1001_1_A_2_2	A	275	3.275	3.175	3.795	2016 splice better, as no proper correlation to Hole A
1001_1_B_2_1	B	130	3.13	-0.085	0.665	3.045	3.795	1001_1_B_2_1	B	1000	4	3.915	4.665
1001_1_B_2_2	B	5	4.005	-0.09	0.66	3.915	4.665	1001_1_B_2_2	B	555	4.555	4.465	5.215
1001_1_A_3_1	A	370	4.37	-0.145	0.845	4.225	5.215	1001_1_A_3_1	A	995	4.995	4.85	5.84
1001_1_A_3_2	A	5	5.005	-0.15	0.835	4.855	5.84	1001_1_A_3_2	A	910	5.91	5.76	6.745	2016 splice better, as no proper correlation to Hole B
1001-1-B-3-1	B	580	5.58	-0.12	1.165	5.46	6.745	1001-1-B-3-1	B	995	5.995	5.875	7.16	2016 splice better, as no proper correlation to Hole B
1001_1_B_3_2	B	5	6.005	-0.125	1.155	5.88	7.16	1001_1_B_3_2	B	485	6.485	6.36	7.64	E2 Top of homogenous part
1001_1_A_4_1	A	404	6.404	-0.25	1.236	6.154	7.64	1001_1_A_4_1	A	1000	7	6.75	8.236	E2 Top of homogenous part
1001_1_A_4_2	A	5	7.005	-0.255	1.231	6.75	8.236	1001_1_A_4_2	A	890	7.89	7.635	9.121	E2 Base of homogenous part
1001_1_B_4_1	B	480	7.48	-0.177	1.641	7.303	9.121	1001_1_B_4_1	B	935	7.935	7.758	9.576	E2 Base of homogenous part, Top of coarse part, A-4-2 tied to B-4-1, and B-4-2 appended to B-4-1
1001_1_B_4_2	B	35	8.035	-0.212	1.541	7.823	9.576	1001_1_B_4_2	B	890	8.89	8.678	10.431	E2 coarse part, appended to B-4-1
1001_1_B_5_1	B	35	9.035	-0.247	1.396	8.788	10.431	1001_1_B_5_1	B	1000	10	9.753	11.396	E2 coarse part, appended to B-4-2
1001_1_B_5_2	B	5	10.005	-0.252	1.391	9.753	11.396	1001_1_B_5_2	B	910	10.91	10.658	12.301	E2 coarse part, appended to B-5-1
1001_1_B_6_1	B	25	11.025	-0.277	1.276	10.748	12.301	1001_1_B_6_1	B	1000	12	11.723	13.276	E2 base of coarse part, appended to B-5-2
1001_1_B_6_2	B	5	12.005	-0.282	1.271	11.723	13.276	1001_1_B_6_2	B	790	12.79	12.508	14.061
1001_1_A_8_1	A	695	12.695	-0.355	1.366	12.34	14.061	1001_1_A_8_1	A	1000	13	12.645	14.366
1001_1_A_8_2	A	5	13.005	-0.36	1.361	12.645	14.366	1001_1_A_8_2	A	745	13.745	13.385	15.106	E3 Top of homogenous part
1001_1_B_7_1	B	620	13.62	-0.382	1.486	13.238	15.106	1001_1_B_7_1	B	995	13.995	13.613	15.481	E3 Top of homogenous part, tied to A-8-2 and B-7-2 appended to B-7-1
1001_1_B_7_2	B	5	14.005	-0.387	1.476	13.618	15.481	1001_1_B_7_2	B	1010	15.01	14.623	16.486	E3 homogenous part, appended to B-7-1
1001_1_B_8_1	B	35	15.035	-0.395	1.451	14.64	16.486	1001_1_B_8_1	B	1000	16	15.605	17.451	E3 Base of homogenous part, Top of coarse part, appended to B-7-2
1001_1_B_8_2	B	130	16.13	-0.512	1.321	15.618	17.451	1001_1_B_8_2	B	880	16.88	16.368	18.201	E3 coarse part, appended to B-8-1
1001_1_A_10_1	A	820	16.82	-0.395	1.381	16.425	18.201	1001_1_A_10_1	A	995	16.995	16.6	18.376	E3 Base of coarse part (Hole A, less coarse, than Hole B), A-10-1 (base of event) appended to B-8-2
1001_1_A_10_2	A	5	17.005	-0.4	1.371	16.605	18.376	1001_1_A_10_2	A	620	17.62	17.22	18.991
1001_1_B_9_1	B	530	17.53	-0.617	1.461	16.913	18.991	1001_1_B_9_1	B	1000	18	17.383	19.461
1001_1_B_9_2	B	5	18.005	-0.622	1.456	17.383	19.461	1001_1_B_9_2	B	855	18.855	18.233	20.311
1001_1_A_11_1	A	690	18.69	-0.44	1.621	18.25	20.311	1001_1_A_11_1	A	1000	19	18.56	20.621
1001_1_A_11_2	A	5	19.005	-0.445	1.616	18.56	20.621	1001_1_A_11_2	A	1000	20	19.555	21.616	White unit with coarse base on top of black unit (top part), no marker for CL16 visible
1001_1_B_10_1	B	100	19.1	-0.722	2.516	18.378	21.616	1001_1_B_10_1	B	960	19.96	19.238	22.476	black unit (bottom part and base), appended to A-11-2
1001_1_B_10_2	B	5	20.005	-0.727	2.471	19.278	22.476	1001_1_B_10_2	B	920	20.92	20.193	23.391
1001_1_A_12_1	A	700	20.7	-0.595	2.691	20.105	23.391	1001_1_A_12_1	A	1000	21	20.405	23.691
1001_1_A_12_2	A	25	21.025	-0.62	2.666	20.405	23.691	1001_1_A_12_2	A	745	21.745	21.125	24.411
1001_1_B_11_1	B	460	21.46	-0.782	2.951	20.678	24.411	1001_1_B_11_1	B	980	21.98	21.198	24.931
1001_1_B_11_2	B	5	22.005	-0.787	2.926	21.218	24.931	1001_1_B_11_2	B	905	22.905	22.118	25.831
1001_1_A_13_1	A	540	22.54	-0.675	3.291	21.865	25.831	1001_1_A_13_1	A	925	22.925	22.25	26.216
1001_1_A_13_2	A	5	23.005	-0.68	3.211	22.325	26.216	1001_1_A_13_2	A	635	23.635	22.955	26.846
1001_1_B_12_1	B	345	23.345	-0.822	3.501	22.523	26.846	1001_1_B_12_1	B	1005	24.005	23.183	27.506
1001_1_B_12_2	B	5	24.005	-0.827	3.501	23.178	27.506	1001_1_B_12_2	B	970	24.97	24.143	28.471	MAIN GAP, A-15-1 appended to B-12-2
1001_1_A_15_1	A	80	26.08	-0.76	2.391	25.32	28.471	1001_1_A_15_1	A	1000	27	26.24	29.391	After Main GAP, appended to B-12-2
1001_1_A_15_2	A	5	27.005	-0.765	2.386	26.24	29.391	1001_1_A_15_2	A	1000	28	27.235	30.386
1001_1_B_14_1	B	410	27.41	-0.912	2.976	26.498	30.386	1001_1_B_14_1	B	1000	28	27.088	30.976
1001_1_B_14_2	B	5	28.005	-0.917	2.971	27.088	30.976	1001_1_B_14_2	B	460	28.46	27.543	31.431
1001_1_A_16_1	A	160	28.16	-0.82	3.271	27.34	31.431	1001_1_A_16_1	A	1000	29	28.18	32.271
1001_1_A_16_2	A	5	29.005	-0.825	3.266	28.18	32.271	1001_1_A_16_2	A	810	29.81	28.985	33.076
1001_1_B_15_1	B	115	29.115	-0.972	3.961	28.143	33.076	1001_1_B_15_1	B	1475	30.475	29.503	34.436	A-17-1 appended to B-15-1 (no correlation possible yet)
1001_1_A_17_1	A	75	30.075	-0.9	4.361	29.175	34.436	1001_1_A_17_1	A	1000	31	30.1	35.361	A-17-1 appended to A-17-1 (no correlation possible yet)
1001_1_A_17_2	A	5	31.005	-0.905	4.356	30.1	35.361	1001_1_A_17_2	A	505	31.505	30.6	35.861
1001_1_B_17_1	B	415	31.415	-1.057	4.446	30.358	35.861	1001_1_B_17_1	B	1000	32	30.943	36.446
1001_1_B_17_2	B	5	32.005	-1.062	4.441	30.943	36.446	1001_1_B_17_2	B	645	32.645	31.583	37.086	Top of homogenous unit, A-18-1 appended to B-17-2
1001_1_A_18_1	A	50	32.05	-0.955	5.036	31.095	37.086	1001_1_A_18_1	A	990	32.99	32.035	38.026	Base of homogenous unit, A-18-1 appended to B-17-2
1001_1_A_18_2	A	80	33.08	-1.035	4.946	32.045	38.026	1001_1_A_18_2	A	780	33.78	32.745	38.726	A-18-2 appended to B-19-2 (core gap)
1001_1_B_19_2	B	10	34.01	-1.067	4.716	32.943	38.726	1001_1_B_19_2	B	950	34.95	33.883	39.666	A-18-2 appended to B-19-2 (core gap) / Top of gray unit E10, A-19-1 appended to B-19-2
1001_1_A_19_1	A	65	34.065	-1.07	5.601	32.995	39.666	1001_1_A_19_1	A	1000	35	33.93	40.601	Base of gray unit, A-19-1 appended to B-19-2
1001_1_A_19_2	A	5	35.005	-1.075	5.596	33.93	40.601	1001_1_A_19_2	A	850	35.85	34.775	41.446
1001_1_B_21_1	B	430	35.43	-1.092	6.016	34.338	41.446	1001_1_B_21_1	B	995	35.995	34.903	42.011	B-21-1 tied to A-19-2, blue, gray pattern, within white
1001_1_B_21_2	B	5	36.005	-1.097	6.006	34.908	42.011	1001_1_B_21_2	B	815	36.815	35.718	42.821
1001_1_A_20_1	A	135	36.135	-1.12	6.686	35.015	42.821	1001_1_A_20_1	A	905	36.905	35.785	43.591	B-21-2 tied to A-20-1, weak correlation of brittle, whiteish interval
1001_1_A_20_2	A	5	37.005	-1.125	6.586	35.88	43.591	1001_1_A_20_2	A	675	37.675	36.55	44.261
1001_1_B_22_1	B	390	37.39	-1.102	6.871	36.288	44.261	1001_1_B_22_1	B	1210	38.21	37.108	45.081
1001_1_B_23_1	B	20	39.02	-1.122	6.061	37.898	45.081	1001_1_B_23_1	B	1000	40	38.878	46.061	B-23-1 appended to B-22-1
1001_1_B_23_2	B	5	40.005	-1.127	6.056	38.878	46.061	1001_1_B_23_2	B	915	40.915	39.788	46.971
1001_1_B_24_1	B	50	41.05	-1.177	5.921	39.873	46.971	1001_1_B_24_1	B	840	41.84	40.663	47.761	B-24-1 appended to B-23-2
1001_1_B_24_2	B	25	42.025	-1.202	5.736	40.823	47.761	1001_1_B_24_2	B	915	42.915	41.713	48.651
1001_1_B_25_1	B	25	43.025	-1.227	5.626	41.798	48.651	1001_1_B_25_1	B	1000	44	42.773	49.626	B-25-1 appended to B-24-2
1001_1_B_25_2	B	5	44.005	-1.232	5.621	42.773	49.626	1001_1_B_25_2	B	930	44.93	43.698	50.551
1001_1_B_26_1	B	60	45.06	-1.292	5.491	43.768	50.551	1001_1_B_26_1	B	1000	46	44.708	51.491	B-26-1 appended to B-25-2
1001_1_B_26_2	B	20	46.02	-1.312	5.471	44.708	51.491	1001_1_B_26_2	B	785	46.785	45.473	52.256
1001_1_B_27_1	B	45	47.045	-1.357	5.211	45.688	52.256	1001_1_B_27_1	B	1000	48	46.643	53.211	B-27-1 appended to B-26-2
1001_1_B_27_2	B	5	48.005	-1.362	5.206	46.643	53.211	1001_1_B_27_2	B	765	48.765	47.403	53.971
1001_1_B_28_1	B	80	49.08	-1.442	4.891	47.638	53.971	1001_1_B_28_1	B	1460	50.46	49.018	55.351	B-28-1 appended to B-27-2
