# Supplementary material for: Late Pleistocene to Holocene event stratigraphy of Lake Hallstatt (Salzkammergut, Austria): revealed by the Hipercorig drilling system and borehole logging
Source: Copernicus journal article supplement (doi:10.5194/sd-33-1-2024), 2024-04-02
Supplement: Supplementary file 2 [file sd-33-1-2024-supplement.zip › Supplement_Table_S2.xlsx]

## Sheet: Table_S2_tie-points
					CSF-A	CCSF-A							CLF-A	CCLF-A							CLF-A	CCLF-A
CL	Name	TIE-point Intervall		Section (mm)	Depth (mblf)	Depth (mcd)		CL	Name	TIE-point Intervall		Section (mm)	Depth (mblf)	Depth (mcd)		CL	Name	TIE-point Intervall		Section (mm)	Depth (mblf)	Depth (mcd)		comment	confidence level of corelation
Hole A								Hole B								2016									(1-3 likely to less likely correlate)
CL1	1001-1-A-1-1	370	390	390	0.39	0.485									TIE	CL1	2016	470	485	485	0.485	0.485		light grey layer	2 / TOP missing
CL2	1001-1-A-1-2	300	355	300	1.3	1.39	TIE	CL2	1001-1-B-1-1	385	430	385	1.385	1.39	TIE	CL2	2016	1260	1300	1260	1.26	1.39		liht grey medium grey double layer	1
								CL3	1001-1-B-1-2	525	610	610	2.61	2.61	TIE	CL3	2016	440	510	510	~2.40	2.61		light layer above thin double red
	1001-1-A-2-1						APPEND		1001-1-B-1-2																3 / GFZ 2016 intervall better
CL4	1001-1-A-2-2	275	390	275	3.275	3.795	TIE	CL4	1001-1-B-2-1	130	195	130	3.13	3.795	TIE	CL4	2016	1345	1390	1345	~3.30	3.795		double red layer	1
							TIE	CL5	1001-1-B-2-1	865	890	890	3.89	4.555	TIE	CL5	2016	940	960	960	~4.1	4.555		light grey-beige double layer	1
CL6	1001-1-A-3-1	370	415	370	4.37	5.215	TIE	CL6	1001-1-B-2-2	555	570	555	4.555	5.215	TIE	CL6	2016	310	320	310	~4.8	5.215		5mm dark brown layer	1
CL7	1001-1-A-3-2	200	225	200	5.2	6.035									TIE	CL7	2016	1160	1200	1160	~5.6	6.035		beige-dark grey double layer
	1001-1-A-3-2						APPEND		1001-1-B-3-1																3 / GFZ 2016 intervall better
								CL8	1001-1-B-3-1	700	715	715	5.715	6.88	TIE	CL8	2016	845	860	860	~6.4	6.88		light layer above fine lam
CL9	1001-1-A-4-1	505		404	6.404	7.64	TIE	CL9	1001-1-B-3-2	485		485	6.485	7.64	TIE	CL9	2016	520		520	~7.3	7.64		Top of turbidite above massflow	1
CL10	1001-1-A-4-2		890	890	7.89	9.121	TIE	CL10	1001-1-B-4-1		480	480	7.48	9.121	TIE	CL10	2016	1900		1900	~8.75	9.121		Base of turbidite above massflow	1
							APPEND		1001-1-B-4-2															B-4-2 appended to B-4-1
							APPEND		1001-1-B-5-1															B-5-1 appended to B-4-2
							APPEND		1001-1-B-5-2															B-5-2 appended to B-5-1
							APPEND		1001-1-B-6-1															B-6-1 appended to B-5-2
CL11	1001-1-A-7-2		850	850	11.94	12.801	TIE	CL11	1001-1-B-6-1		525	525	11.525	12.801										Below Base of E2	1
CL12	1001-1-A-8-1	695	775	695	12.695	14.061	TIE	CL12	1001-1-B-6-2	790	860	790	12.79	14.061	TIE	CL12	2016	1250	1330	1250	~12.65	14.061		brown turbidite, thin sandy base	1
CL13	1001-1-A-8-2	615	745	745	13.745	15.106	TIE	CL13	1001-1-B-7-1	505	620	620	13.62	15.106	TIE	CL13	2016	1000	1140	1140	~13.75	15.106		brown turbidite, sandy base	1
							APPEND		1001-1-B-7-2
							APPEND		1001-1-B-8-1															B-8-1 appended to B-7-2
CL14	1001-1-A-10-1		820	820	16.82	18.201	TIE	CL14	1001-1-B-8-2		880	880	16.88	18.201										End of B-8-2 tied to Base of Event in A-10-1	1
CL15	1001-1-A-10-2	505	620	620	17.62	18.991	TIE	CL15	1001-1-B-9-1	420	530	530	17.53	18.991										brown turbidite, sandy base	1
CL16	1001-1-A-11-1	640	690	690	18.69	20.311	TIE	CL16	1001-1-B-9-2	800	855	855	18.855	20.311										white turbidite, sandy base	1
CL17	1001-1-A-11-2						APPEND	CL17	1001-1-B-10-1															black unit E5 (appended for now)	2
CL18	1001-1-A-12-1	610	700	700	20.7	23.391	TIE	CL18	1001-1-B-10-2	825	920	920	20.92	23.391										brown homogeneous, light sandy base	1
CL19	1001-1-A-12-2	690	745	745	21.745	24.411	TIE	CL19	1001-1-B-11-1	420	460	460	21.46	24.411										dark grey, homogeneous	1
CL20	1001-1-A-13-1		540	540	22.54	25.831	TIE	CL20	1001-1-B-11-2		905	905	22.905	25.831										1cm light sandy layer: base of 58cm thick turbidite E6	1
CL21	1001-1-A-13-2	605	635	635	23.635	26.846	TIE	CL21	1001-1-B-12-1	320	345	345	23.345	26.846										medium grey-brownish layer	1
	1001-1-A-15-1						APPEND		1001-1-B-12-2															main-coring gap
CL22	1001-1-A-15-2	955	1000	1000	28	30.386	TIE	CL22	1001-1-B-14-1	370	410	410	27.41	30.386										medium grey-brownish layer	1
CL23	1001-1-A-16-1	140	160	160	28.16	31.431	TIE	CL23	1001-1-B-14-2	440	460	460	28.46	31.431										dark brown double layer	1
CL24	1001-1-A-16-2	780	810	810	29.81	33.076	TIE	CL24	1001-1-B-15-1	85	115	115	29.115	33.076										medium grey layer, black patches	2
	1001-1-A-17-1						APPEND		1001-1-B-15-1															B-15-1 (not yet linked to B-16-1 which is form the same coring depth) hence for now appended to A-17-1
CL25	1001-1-A-17-1	555	575	575	30.575	34.936	TIE	CL25	1001-1-B-16-1	1050	1060	1060	31.06	34.936										medium grey layer with light grey base (correlatable to B-16-1 which is not included in the splice yet as not appended to linked to B-15-1, as B-15-1 and B-16-1 are cored from the same coring depth)	2
CL26	1001-1-A-17-2	505	505	505	31.505	35.861	TIE	CL26	1001-1-B-17-1		415	415	31.415	35.861										3mm dark layer above thick turbidite (CT image, slightly coarser)	2
CL27	1001-1-A-18-1						APPEND	CL27	1001-1-B-17-2															homogeneous layer, part of turbitide (appended for now)	2
	1001-1-A-18-2						APPEND		1001-1-B-19-2															core gap (Top part B-19-1 fall in and deformed, no correlation possible, potentialy up to 55 cm missing)	3
CL28	1001-1-A-19-1						APPEND	CL28	1001-1-B-19-2															homogeneous layer, part of turbidite (appended for now)	3
	1001-1-A-19-2	180	280	180	35.18	40.776	TIE		1001-1-B-20-1	730	830	730	33.73	40.776										sequence of light dark layers are tied to B-20-1 (which is from the same coring depth as B-21-1 and B-21-2), not in composite section	3
CL29	1001-1-A-19-2	840	850	850	35.85	41.446	TIE	CL29	1001-1-B-21-1	420	430	430	35.43	41.446										A-19-2 and B-21-1 are appended for now, (B-20-1 will help to tie them together)	3
CL30	1001-1-A-20-1	135	145	135	36.135	42.821	TIE	CL30	1001-1-B-21-2	815	825	815	36.815	42.821										thin sandy layer	3
CL31	1001-1-A-20-2	670	675	675	37.675	44.261	TIE	CL31	1001-1-B-22-1	380	390	390	37.39	44.261										thin dark double layers	1
	1001-1-B-22-1						APPEND		1001-1-B-23-1															core gap after E11
CL32	1001-1-A-22-1	520	530	530	39.53	46.221	TIE	CL32	1001-1-B-23-2	155	165	165	40.165	46.221										reddish layer	1
	1001_1_B_24_1						APPEND		1001-1-B-23-2
	1001_1_B_24_2						APPEND		1001_1_B_25_1
	1001_1_B_26_1						APPEND		1001_1_B_25_2
	1001_1_B_26_2						APPEND		1001_1_B_27_1
	1001_1_B_28_1						APPEND		1001_1_B_27_2
