# Supplementary material for: Late Pleistocene to Holocene event stratigraphy of Lake Hallstatt (Salzkammergut, Austria): revealed by the Hipercorig drilling system and borehole logging
Source: Copernicus journal article supplement (doi:10.5194/sd-33-1-2024), 2024-04-02
Supplement: Supplementary file 2 [file sd-33-1-2024-supplement.zip › Supplement_Table_S3.xlsx]

## Sheet: Table_S3_vertical-offset
Name	Hole	CLF-A		Section Depth		Vertical offset (m)	Vertical offset total (m)	CCLF-A (whole core)
		Top Depth (mblf)	Bottom Depth (mblf)	Top (m)	Bottom (m)			Top depth (mcd)	Bottom depth (mcd)
1001_1_A_1_1	A	0	1	0.04	1	0.095	0.095	0.095	1.095
1001_1_A_1_2	A	1	1.9	0.005	0.895	0.09	1.09	1.09	1.99
1001_1_B_1_1	B	1	2	0.04	1	0.005	1.005	1.005	2.005
1001_1_B_1_2	B	2	2.93	0.005	0.925	0	2	2	2.93
1001_1_A_2_1	A	2	3	0.05	1	0.525	2.525	2.525	3.525
1001_1_A_2_2	A	3	3.91	0.005	0.91	0.52	3.52	3.52	4.43
1001_1_B_2_1	B	3	4	0.04	1	0.665	3.665	3.665	4.665
1001_1_B_2_2	B	4	4.9	0.005	0.9	0.66	4.66	4.66	5.56
1001_1_A_3_1	A	4	5	0.045	0.995	0.845	4.845	4.845	5.845
1001_1_A_3_2	A	5	5.9	0.005	0.91	0.835	5.835	5.835	6.735
1001_1_B_3_1	B	5	6	0.03	0.995	1.165	6.165	6.165	7.165
1001_1_B_3_2	B	6	6.93	0.005	0.93	1.155	7.155	7.155	8.085
1001_1_A_4_1	A	6	7	0.1	1	1.236	7.236	7.236	8.236
1001_1_A_4_2	A	7	8.01	0.005	1.01	1.231	8.231	8.231	9.241
1001_1_B_4_1	B	7	8	0.052	0.935	1.641	8.641	8.641	9.641
1001_1_B_4_2	B	8	8.93	0.035	0.89	1.541	9.541	9.541	10.471
1001_1_B_5_1	B	9	10	0.035	1	1.396	10.396	10.396	11.396
1001_1_B_5_2	B	10	10.91	0.005	0.91	1.391	11.391	11.391	12.301
1001_1_B_6_1	B	11	12	0.025	1	1.276	12.276	12.276	13.276
1001_1_B_6_2	B	12	12.86	0.005	0.86	1.271	13.271	13.271	14.131
1001_1_A_8_1	A	12	13	0.1	1	1.366	13.366	13.366	14.366
1001_1_A_8_2	A	13	14	0.005	1.01	1.361	14.361	14.361	15.361
1001_1_B_7_1	B	13	14	0.1	0.995	1.486	14.486	14.486	15.486
1001_1_B_7_2	B	14	15.01	0.005	1.01	1.476	15.476	15.476	16.486
1001_1_B_8_1	B	15	16	0.035	1	1.451	16.451	16.451	17.451
1001_1_B_8_2	B	16	16.88	0.13	0.88	1.321	17.321	17.321	18.201
1001_1_A_10_1	A	16	17	0.035	0.995	1.381	17.381	17.381	18.381
1001_1_A_10_2	A	17	17.85	0.005	0.85	1.371	18.371	18.371	19.221
1001_1_B_9_1	B	17	18	0.105	1	1.461	18.461	18.461	19.461
1001_1_B_9_2	B	18	19.01	0.005	1.01	1.456	19.456	19.456	20.466
1001_1_A_11_1	A	18	19	0.04	1	1.621	19.621	19.621	20.621
1001_1_A_11_2	A	19	19.93	0.005	0.925	1.616	20.616	20.616	21.546
1001_1_B_10_1	B	19	20	0.1	0.96	2.516	21.516	21.516	22.516
1001_1_B_10_2	B	20	21.01	0.005	1	2.471	22.471	22.471	23.481
1001_1_A_12_1	A	20	21	0.15	1.005	2.691	22.691	22.691	23.691
1001_1_A_12_2	A	21	22	0.025	1.005	2.666	23.666	23.666	24.666
1001_1_B_11_1	B	21	22	0.055	0.98	2.951	23.951	23.951	24.951
1001_1_B_11_2	B	22	23.01	0.005	1	2.926	24.926	24.926	25.936
1001_1_A_13_1	A	22	23	0.055	0.925	3.291	25.291	25.291	26.291
1001_1_A_13_2	A	23	24.01	0.005	1.01	3.211	26.211	26.211	27.221
1001_1_B_12_1	B	23	24	0.035	1.005	3.501	26.501	26.501	27.501
1001_1_B_12_2	B	24	24.98	0.005	0.97	3.501	27.501	27.501	28.481
1001_1_A_15_1	A	26	27	0.08	1	2.391	28.391	28.391	29.391
1001_1_A_15_2	A	27	28.01	0.005	1.015	2.386	29.386	29.386	30.396
1001_1_B_14_1	B	27	28	0.085	1	2.976	29.976	29.976	30.976
1001_1_B_14_2	B	28	29.01	0.005	0.995	2.971	30.971	30.971	31.981
1001_1_A_16_1	A	28	29	0.055	1	3.271	31.271	31.271	32.271
1001_1_A_16_2	A	29	30.01	0.005	0.96	3.266	32.266	32.266	33.276
1001_1_B_15_1	B	29	30.51	0.055	1.475	3.961	32.961	32.961	34.471
1001_1_A_17_1	A	30	31	0.075	1	4.361	34.361	34.361	35.361
1001_1_A_17_2	A	31	32.01	0.005	1.007	4.356	35.356	35.356	36.366
1001_1_B_17_1	B	31	32	0.085	1	4.446	35.446	35.446	36.446
1001_1_B_17_2	B	32	32.7	0.005	0.645	4.441	36.441	36.441	37.141
1001_1_A_18_1	A	32	33	0.05	0.99	5.036	37.036	37.036	38.036
1001_1_A_18_2	A	33	33.81	0.08	0.785	4.946	37.946	37.946	38.756
1001_1_B_19_2	B	34	34.95	0.005	0.95	4.716	38.716	38.716	39.666
1001_1_A_19_1	A	34	35	0.035	1	5.601	39.601	39.601	40.601
1001_1_A_19_2	A	35	35.93	0.005	0.93	5.596	40.596	40.596	41.526
1001_1_B_21_1	B	35	36	0.025	0.995	6.016	41.016	41.016	42.016
1001_1_B_21_2	B	36	36.88	0.005	0.86	6.006	42.006	42.006	42.886
1001_1_A_20_1	A	36	37	0.045	0.905	6.686	42.686	42.686	43.686
1001_1_A_20_2	A	37	37.93	0.005	0.96	6.586	43.586	43.586	44.516
1001_1_B_22_1	B	37	38.21	0.005	1.21	6.871	43.871	43.871	45.081
1001_1_B_23_1	B	39	40	0.02	1	6.061	45.061	45.061	46.061
1001_1_B_23_2	B	40	40.92	0.005	0.915	6.056	46.056	46.056	46.976
1001_1_B_24_1	B	41	41.87	0.05	0.84	5.921	46.921	46.921	47.791
1001_1_B_24_2	B	41.87	42.79	0.025	0.915	5.736	47.606	47.606	48.526
1001_1_B_25_1	B	43	44	0.025	1	5.626	48.626	48.626	49.626
1001_1_B_25_2	B	44	44.93	0.005	0.93	5.621	49.621	49.621	50.551
1001_1_B_26_1	B	45	46	0.06	1	5.491	50.491	50.491	51.491
1001_1_B_26_2	B	46	46.9	0.02	0.785	5.471	51.471	51.471	52.371
1001_1_B_27_1	B	47	48	0.045	1	5.211	52.211	52.211	53.211
1001_1_B_27_2	B	48	48.82	0.005	0.765	5.206	53.206	53.206	54.026
1001_1_B_28_1	B	49	50.5	0.08	1.46	4.891	53.891	53.891	55.391
1001_1_B_20_1	B	33	33.85	0.035	0.85
1001_1_A_5_1	A	8	9	0.063	0.945
1001_1_A_6_1	A	9	10.52	0.005	1.54
1001_1_A_7_1	A	10	10.98	0.05	0.91
1001_1_A_7_2	A	10.98	11.91	0.05	0.93
1001_1_A_9_1	A	14	15	0.08	0.995
1001_1_A_9_2	A	15	16.01	0.005	0.99
1001_1_A_21_1	A	38	39.1	0.02	1.1
1001_1_A_22_1	A	39	39.8	0.025	0.795
1001_1_A_23_1	A	40	40.74	0.03	0.74
1001_1_B_16_1	B	29	30.51	0.02	1.46
1001_1_B_18_1	B	31	31.98	0.035	0.955
1001_1_B_19_1	B	33	34	0.045	1.005
